# Supplementary material for: Genome-wide identification and expression profiling analysis of DIR gene family in Setaria italica
Source: Front Plant Sci. 2023 Sep 20;14:1243806. doi: 10.3389/fpls.2023.1243806 (PMC10548141; doi:10.3389/fpls.2023.1243806)
Supplement: Supplementary file 5 [file DataSheet_4.xlsx]

## Sheet: Supplemental Data4
Supplemental Data 4. Synteny gene pairs
The collinearity of DIR gene between Si and At		The collinearity of DIR gene between Si and Os
SiDIR6	AT4G11180.1	SiDIR6	LOC_Os03g28180.1
SiDIR1	AT4G11180.1	SiDIR7	LOC_Os07g44250.1
SiDIR6	AT4G23690.1	SiDIR1	LOC_Os07g01600.1
SiDIR3	AT5G49040.1	SiDIR16	LOC_Os01g65700.1
SiDIR1	AT5G42500.1	SiDIR22	LOC_Os11g07670.1
SiDIR6	AT5G42500.1	SiDIR23	LOC_Os11g07740.1
SiDIR10	AT3G16450.1	SiDIR27	LOC_Os11g07830.1
SiDIR23	AT1G07730.2	SiDIR33	LOC_Os11g42550.1
SiDIR37	AT1G65870.1	SiDIR30	LOC_Os11g10790.1
SiDIR37	AT2G28670.1	SiDIR29	LOC_Os11g10870.1
SiDIR37	AT2G39430.1	SiDIR27	LOC_Os12g07580.1
SiDIR37	AT3G55230.1	SiDIR37	LOC_Os01g62030.1
		SiDIR36	LOC_Os03g52920.1
		SiDIR35	LOC_Os03g59440.1
		SiDIR38	LOC_Os03g05030.1
		SiDIR37	LOC_Os03g17220.1
The collinearity of DIR gene between Si and Zm		The collinearity of DIR gene between Si and Gm
SiDIR1	Zm00001d007935	SiDIR3	Glyma.07G157100.1
SiDIR7	Zm00001d022270	SiDIR3	Glyma.08G258300.1
SiDIR1	Zm00001d018628	SiDIR3	Glyma.18G282600.1
SiDIR16	Zm00001d042633	SiDIR3	Glyma.18G207700.1
SiDIR19	Zm00001d023570	SiDIR30	Glyma.03G044300.1
SiDIR20	Zm00001d004753	SiDIR29	Glyma.03G045600.1
SiDIR19	Zm00001d053055	SiDIR37	Glyma.11G144000.1
SiDIR23	Zm00001d004753	SiDIR37	Glyma.12G067400.1
SiDIR22	Zm00001d004754
SiDIR27	Zm00001d053055
SiDIR36	Zm00001d033942
SiDIR38	Zm00001d027636
SiDIR37	Zm00001d012432
SiDIR37	Zm00001d047775
